# Supplementary material
Source: publisher site journal article supplement (https://www.spandidos-publications.com/5582/downloadSupplementary)

Figure S1. Protein profiles of exosomes from HNSCC cell lines UM-SCC-11B and UM-SCC-14C treated with cetuximab. The two HNSCC cell lines were exemplarily treated with fractionated RT and/or Cetux (5  $\mu$ g/ml) on days 3, 5 and 7. Exosomes were isolated from concentrated supernatants. Western blotting of PD-L1, TRAIL and TSG101 were performed. In the exosomes from both cell lines, significant changes of exosomal PD-L1 or TRAIL expression after treatment with Cetux alone or combined therapy of Cetux and RT were not observed. HNSCC, head and neck squamous cell carcinoma; Cetux, cetuximab; RT, radiotherapy; PD-L1, programmed cell death ligand-1.

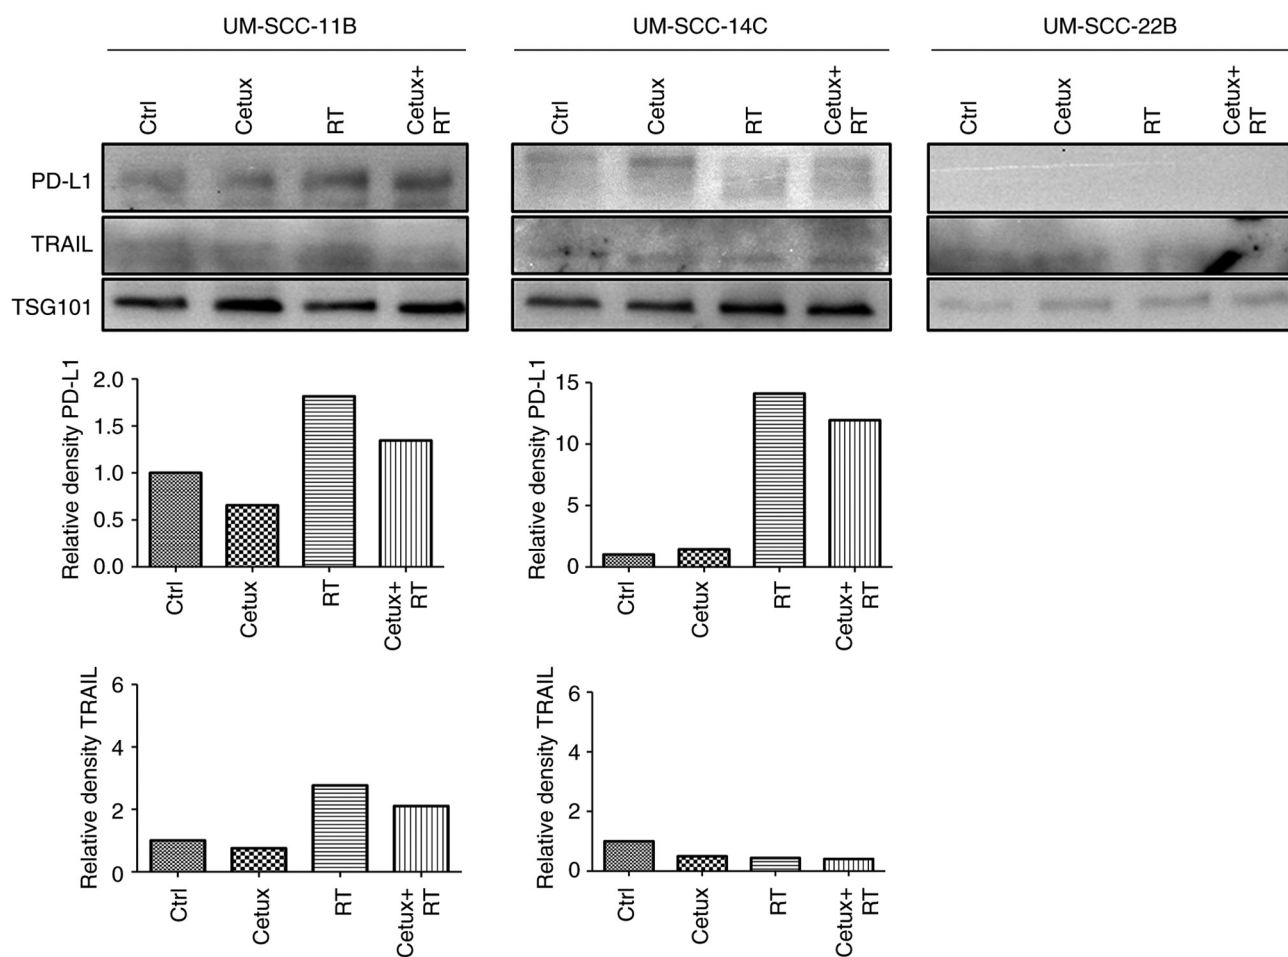

Supplement: Supplementary file 1 [file downloadSupplementary]
